# Supplementary material for: Thiophene derivatives as electrode materials for high-performance sodium-ion batteries
Source: Royal Society of Chemistry journal article supplement (doi:10.1039/d1ta02181h), 2021-01-01
Supplement: d1ta02181h1.pdf [file d1ta02181h1.pdf]

# Thiophene Derivatives as Electrode Materials for High-Performance Sodium-Ion Batteries

Chao Ma,<sup>a</sup> Liang-Yu Wang,<sup>a</sup> Mou-Hai Shu,<sup>a</sup> Cheng-Cheng Hou,<sup>a</sup> Kai-Xue Wang,<sup>\*ab</sup>  
and Jie-Sheng Chen<sup>\*a</sup>

<sup>a</sup>Shanghai Electrochemical Energy Devices Research Center, School of Chemistry and Chemical Engineering, Shanghai Jiao Tong University, Shanghai 200240, P. R. China

<sup>b</sup>Key Laboratory of Materials Processing and Mold of Ministry of Education, Zhengzhou University, Zhengzhou, 450001, PR China

## Corresponding Author

\* E-mail Address: [k.wang@sjtu.edu.cn](mailto:k.wang@sjtu.edu.cn) (KXW), [chemcj@sjtu.edu.cn](mailto:chemcj@sjtu.edu.cn) (JSC)

## Experimental section

The synthesis procedure of STTDC was shown in **Figure S2**.

### *Synthesis of STTDC*

Sodium thieno[3,2-*b*]thiophene-2,5-dicarboxylate (STTDC) was prepared by using thieno[3,2-*b*]thiophene (TT) as a precursor through the procedure illustrated in **Figure S2**. First, 2,5-dibromothieno[3,2-*b*]thiophene (DBTT) was synthesized by one step reaction of TT with N-bromosuccinimide (NBS).<sup>1</sup> DBTT should be stored in dark and at low temperature. Then, 1.42 g of DBTT and 1.62 g of dried copper (I) cyanide were dissolved in 20 mL of dry DMF. After refluxed under nitrogen for 70 h, the reaction mixture was poured into ice-water. The solid precipitation was collected by filtration and washed with water. The solid was stirred in water containing ethylene-

diamine (50 mL) for 1 h. Finally, thieno[3,2-*b*]thiophene-2,5-dicarbonitrile (TTDC) was prepared by filtration, washing with water and drying.<sup>2</sup>

0.41 g of TTDC was dispersed in NaOH aqueous solution (1.28 g NaOH dissolved in 20 mL H<sub>2</sub>O). The mixture was refluxed under vigorously stirring for 35 h. After cooling down to room temperature, active carbon was added. The whole mixture was refluxed for an additional 1 h. Subsequently, the mixture was filtered and washed with NaOH solution and then water. 6 M HCl was added to the filtrate dropwise to give white precipitate. After filtered and washed by water, the precipitate was dried at 65 °C to obtain 2,5-thieno[3,2-*b*]thiophene dicarboxylic acid (TTDCA). The <sup>1</sup>H and <sup>13</sup>C NMR spectrums were shown in **Figure S3**.

**<sup>1</sup>H-NMR (400 MHz, DMSO-*d*6):** δ 13.5, 8.2 (s, 2H)

**<sup>13</sup>C-NMR (75 MHz, DMSO-*d*6):** δ 126.8, 139.9, 142.7, 163.5

TTDCA (0.50 g) and NaOH (0.23 g) were added into 15 mL methyl alcohol (MeOH) at room temperature under constant magnetic stirring for overnight. The mixture was filtered and washed with MeOH three times. After dried in vacuum at 80 °C for 10 h, sodium thieno[3,2-*b*]thiophene-2,5-dicarboxylate (STTDC) was obtained.

#### *Characterization*

Scanning electron microscopy (SEM) observation was performed on a FEI Nova NanoSEM 2300. <sup>1</sup>H and <sup>13</sup>C NMR spectra were recorded on a Bruker 400 spectrometer. In situ diffuse reflectance infrared Fourier transform spectroscopy (DRIFTS) analyses were performed on an FTIR spectrometer (PerkinElmer Frontier FT-IR Spectrometer) from 4000 to 650 cm<sup>-1</sup>.

The working electrodes were made by mixing 60 wt% the active material, 30 wt% conducting agent (Super P) and 10 wt% binder (sodium alginate, SA). Then the slurry was spread onto a copper foil and dried at 80 °C for 24 h in a vacuum drying oven. The electrode was cut into discs of 12 mm in diameter and pressed at 6 MPa. The mass loading of STTDC is about 0.2 mg cm<sup>-2</sup>. A CR2016 type coin half-cell battery was assembled in an Ar-filled glove-box. Sodium metal was used as the counter electrode, and glass-fiber (GF) as the separator, and 1.0 M NaClO<sub>4</sub> in a mixture of ethylene carbonate (EC) and propylene carbonate (PC) (1:1 in volume) with fluoroethylene carbonate (FEC, 5 wt%) as the electrolyte.

Solid-state sodium-ion batteries are assembled as follows: PEO (molecular weights  $M_n=600000$ ) and NaClO<sub>4</sub> were dissolved in tetrahydrofuran at a molar ratio of EO:Na=8:1. The Al<sub>2</sub>O<sub>3</sub> nano powder and PEO(NaClO<sub>4</sub>)/THF solution with weight ratio of 4:1 (based on the solid content) were mixed homogeneously, and the mixture was cast to form a solid electrolyte film in an argon-filled glovebox. The solid electrolyte film was cut into the discs of 19 mm in diameter. A CR2016 type coin solid-state sodium-ion battery was assembled in an Ar-filled glovebox. Thioindigo was used as working electrode, and sodium metal as the counter electrode, and PEO-NaClO<sub>4</sub>-Al<sub>2</sub>O<sub>3</sub> as solid-state electrolyte. Galvanostatic charge-discharge experiments were conducted on a NEWARE cell testing system (CT-4800, Shenzheng, China). The AC impedance measurements and CV (cyclic voltammetry) were carried out using an Autolab PGSTAT302N. A.C. impedance spectrums were measured with a frequency range from 0.1 Hz to 100 KHz. CV measurement was performed within the

range of 0.01-3 V at a scanning rate of 0.1 mV s<sup>-1</sup>.

### *Computational Methods*

The first-principles calculations were conducted within the formalism of spin-polarization density functional theory (DFT). The quantum chemical calculation analyses of the LUMO/HOMO of Na<sub>x</sub>-STTDC (x=0, 2, 4, 6). By using the Gaussian 09 package, the quantum chemical calculations at the level of M06/6-31G+ (d, p) were carried out to obtain molecular orbital distributions of Na<sub>x</sub>-STTDC (x=0, 2, 4, 6).

Based on the change of Gibbs free energy, the intercalation/deintercalation voltages of Na<sub>x</sub>-STTDC (x=0, 2, 4, 6) were further calculated with the reference to Na

metal. The equation of 
$$V^{Na_x+2C_8H_2O_4S_2} = - \frac{G_{Na_x+2+nC_8H_2O_4S_2} - G_{Na_x+2C_8H_2O_4S_2} - G_{nNa}}{n}$$
 is

used to obtain the discharge voltage,<sup>3,4</sup> where G is the Gibbs free energy.

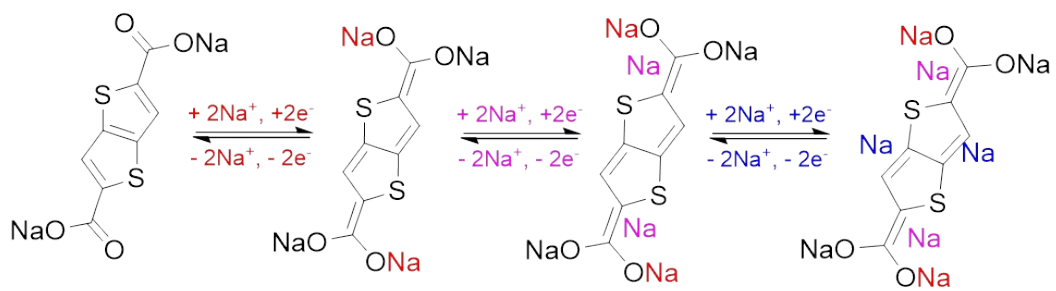

**Figure S1** Molecular structure and reversible Na-ion insertion/extraction mechanism of STTDC.

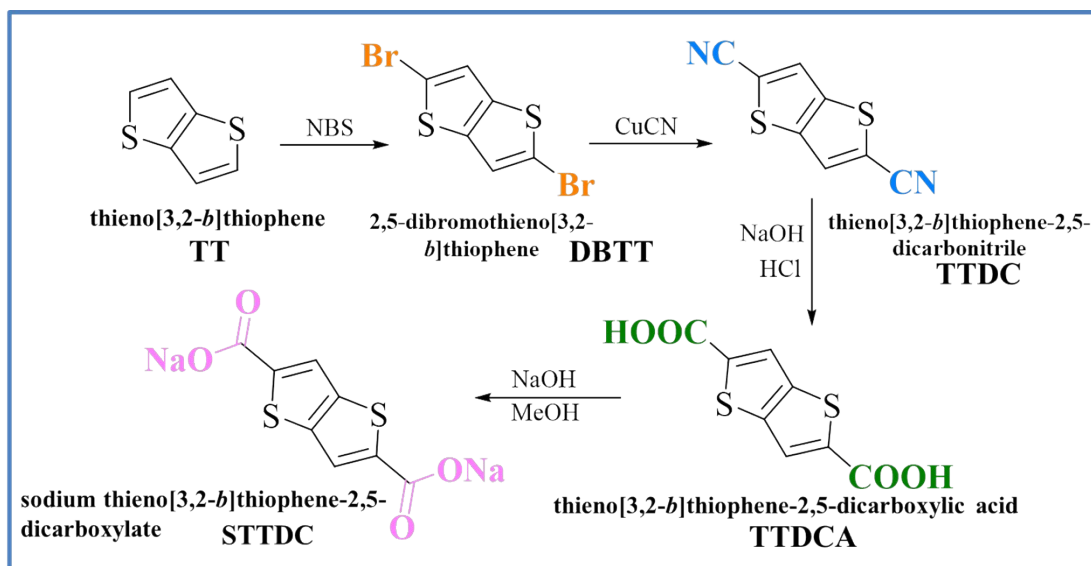

**Figure S2** Synthesis route diagram of the STTDC

# Thieno[3,2-b]thiophene-2,5-dicarboxylic acid (TTDCA)

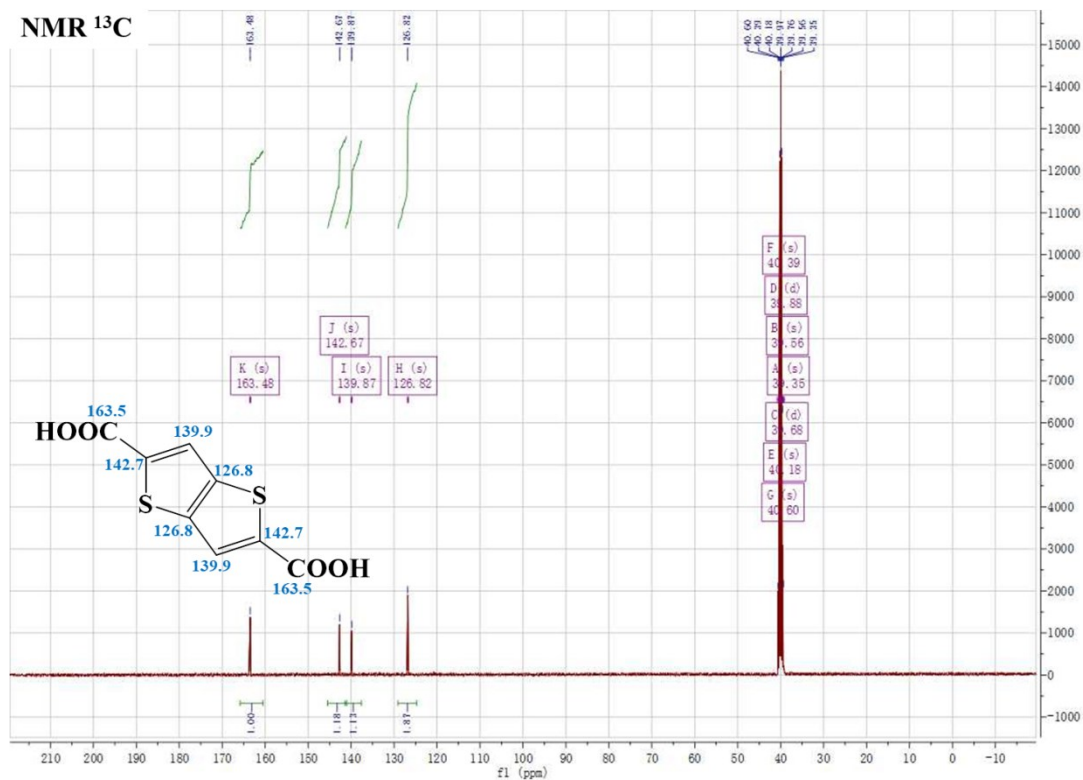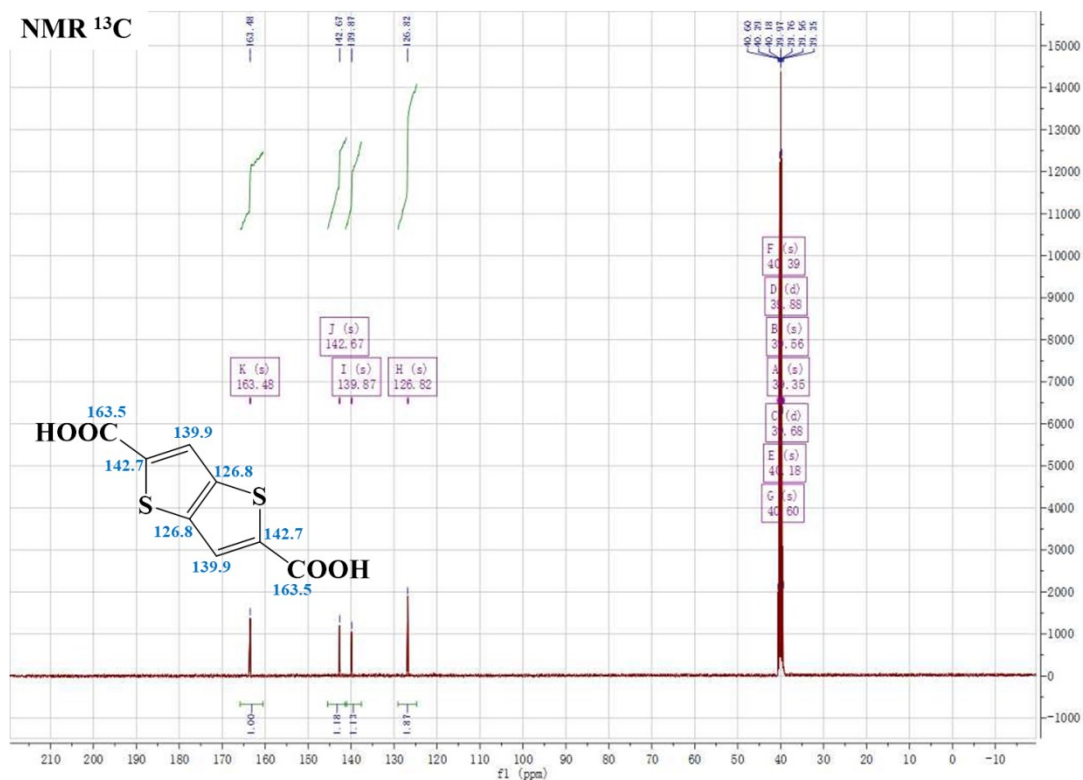

Figure S3 <sup>1</sup>H (top) and <sup>13</sup>C (bottom) NMR spectra of TTDCA

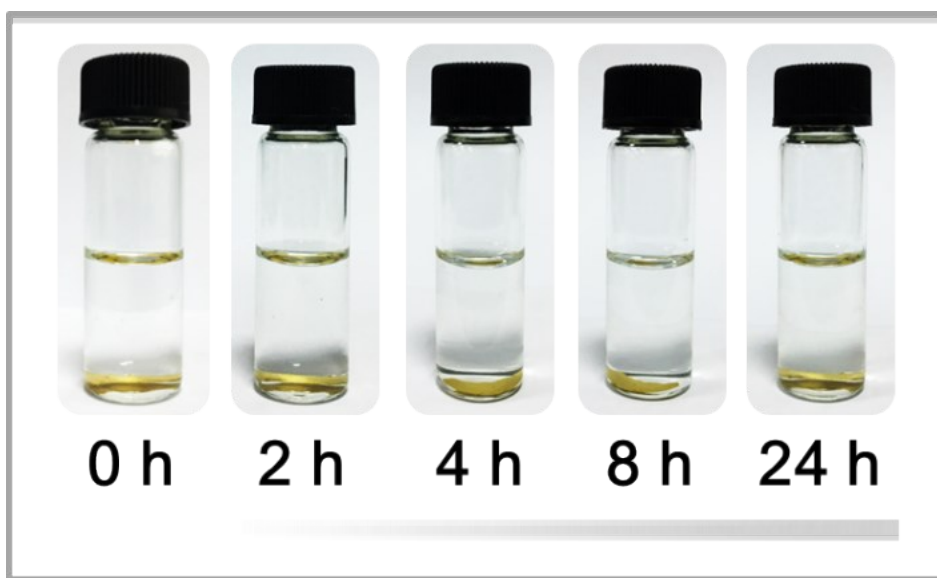

**Figure S4** The dissolvability test of STTDC in electrolyte.



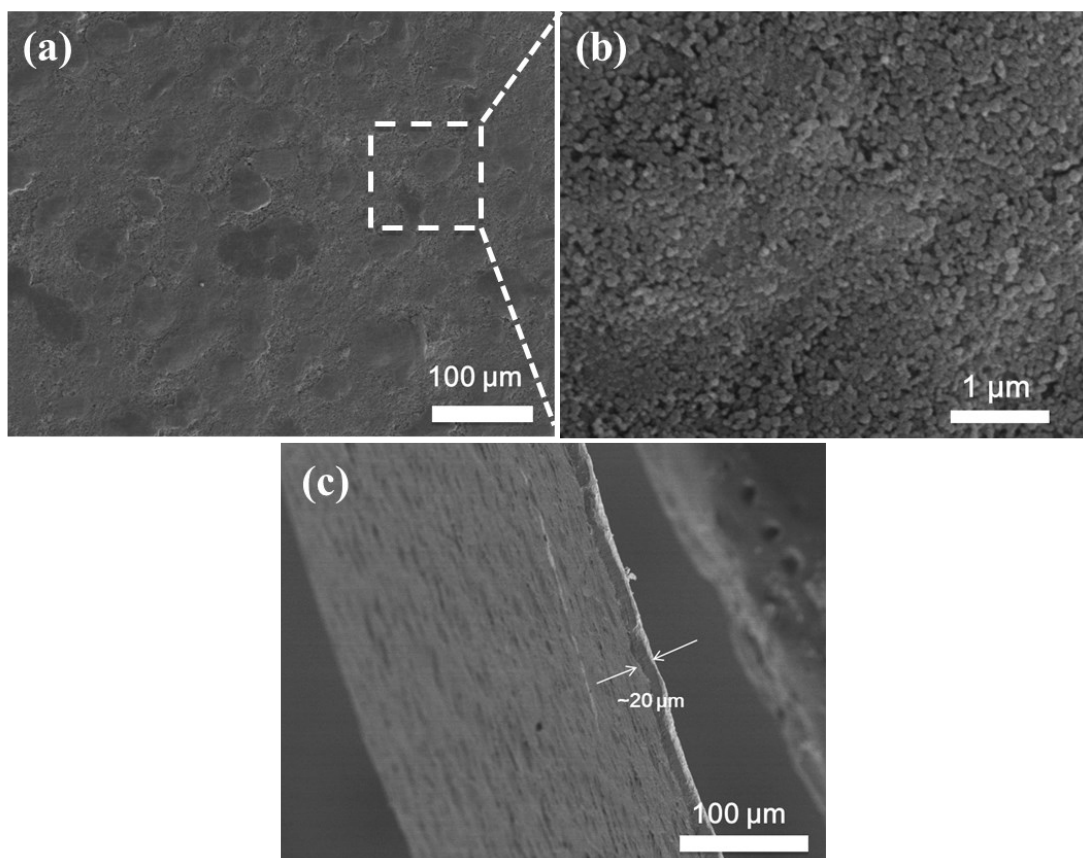

**Figure S5** (a-b) Top- and (c) side-view SEM images of the STTDC electrode after recrystallization.

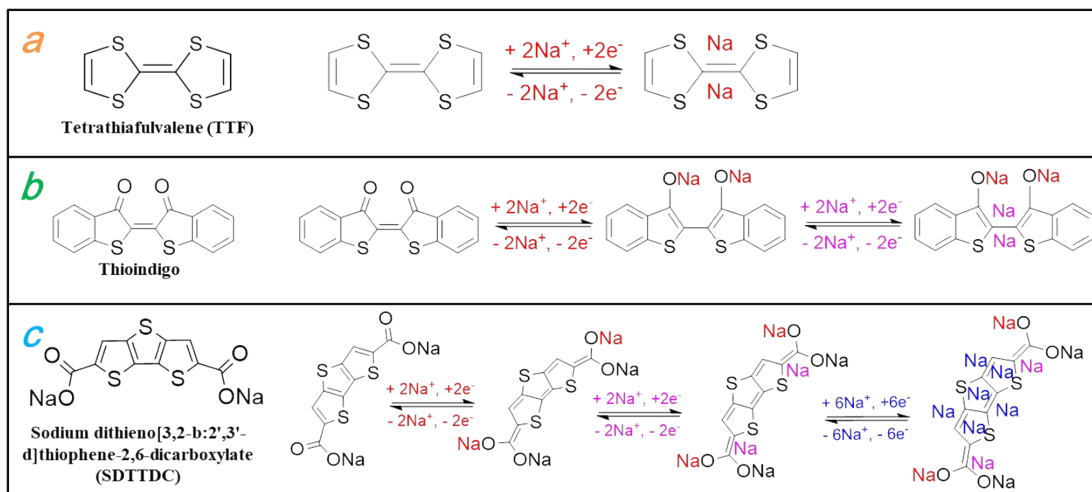

**Figure S6** Molecular structure and reversible Na-ion insertion/extraction mechanism of tetrathiafulvalene, thioindigo and sodium dithieno[3,2-b:2',3'-d]thiophene-2,6-dicarboxylate.

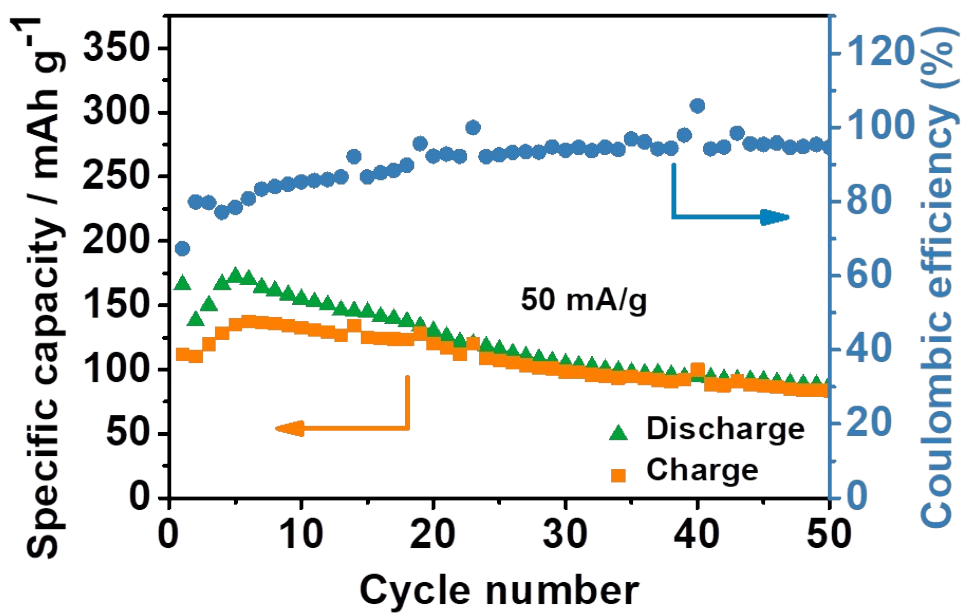

**Figure S7** Cycling performance of thioindigo at a current density of 50 mA g<sup>-1</sup> under 55 °C. The test was performed with a solid-state sodium-ion battery assembled with PEO-NaClO<sub>4</sub>-Al<sub>2</sub>O<sub>3</sub> as the solid-state electrolyte.

**Table S1** Coordinates of molecular structures

All coordinates are reported as XYZ Cartesian coordinates. Converged geometries and the thermochemistry were also obtained from M06/6-31+G(d,p) level of theory. They are stated in Hartrees units. All energies reported were calculated using the GAUSSIAN 09 Revision-D.01 computational chemistry package.

**STTDC****Table S1a**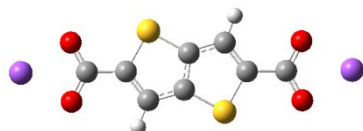

## Standard orientation

| Center Number | Element Symbol | Coordinates (Angstroms) |          |           |
|---------------|----------------|-------------------------|----------|-----------|
|               |                | X                       | Y        | Z         |
| 1             | C              | -2.28365                | 0.045518 | 0.000024  |
| 2             | C              | -1.42697                | 1.115092 | 0.000007  |
| 3             | C              | -0.07658                | 0.694224 | -0.000014 |
| 4             | C              | 0.076586                | -0.69422 | -0.000001 |
| 5             | C              | 2.283653                | -0.04552 | -0.000063 |
| 6             | C              | 1.426968                | -1.11509 | -0.000031 |
| 7             | H              | -1.78928                | 2.137517 | -0.000002 |
| 8             | H              | 1.789283                | -2.13752 | -0.000032 |
| 9             | S              | -1.46263                | -1.50055 | 0.000047  |
| 10            | S              | 1.462634                | 1.500556 | -0.000056 |
| 11            | C              | -3.76263                | 0.090337 | 0.000025  |
| 12            | O              | -4.39082                | -1.01047 | 0.000195  |
| 13            | O              | -4.32116                | 1.226957 | 0.000146  |
| 14            | C              | 3.76263                 | -0.09033 | -0.000102 |
| 15            | O              | 4.390822                | 1.010466 | -0.000162 |
| 16            | O              | 4.321154                | -1.22696 | -0.000128 |
| 17            | Na             | -6.25717                | 0.172038 | 0.000286  |
| 18            | Na             | 6.257169                | -0.17205 | -0.000221 |

Electronic Energy (EE) = -1727.678830

**Table S1b**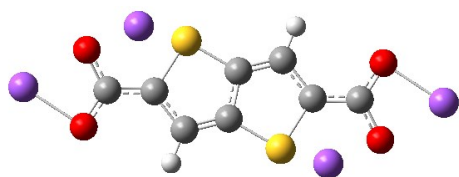

Standard orientation

| Center Number | Element Symbol | Coordinates (Angstroms) |          |          |
|---------------|----------------|-------------------------|----------|----------|
|               |                | X                       | Y        | Z        |
| 1             | C              | -2.34441                | 0.219859 | 0.007397 |
| 2             | C              | -1.32896                | 1.145919 | -0.40913 |
| 3             | C              | -0.06309                | 0.662598 | -0.28176 |
| 4             | C              | 0.063286                | -0.66293 | 0.281268 |
| 5             | C              | 2.34453                 | -0.22043 | -0.00845 |
| 6             | C              | 1.329132                | -1.14637 | 0.408383 |
| 7             | H              | -1.61123                | 2.106316 | -0.83123 |
| 8             | H              | 1.611398                | -2.10677 | 0.830481 |
| 9             | S              | -1.54398                | -1.23177 | 0.789239 |
| 10            | S              | 1.544219                | 1.23147  | -0.78967 |
| 11            | C              | -3.74025                | 0.376359 | -0.01189 |
| 12            | O              | -4.51069                | -0.68646 | 0.242193 |
| 13            | O              | -4.29625                | 1.494895 | -0.32523 |
| 14            | C              | 3.74036                 | -0.37621 | 0.012277 |
| 15            | O              | 4.510564                | 0.686868 | -0.24131 |
| 16            | O              | 4.2966                  | -1.49453 | 0.326187 |
| 17            | Na             | -6.16711                | 0.734607 | 0.401326 |
| 18            | Na             | 6.167055                | -0.73413 | -0.40137 |
| 19            | Na             | -3.29247                | -1.94163 | -1.08764 |
| 20            | Na             | 3.291671                | 1.941734 | 1.088075 |

Electronic Energy (EE) = -2052.224078

**Table S1c**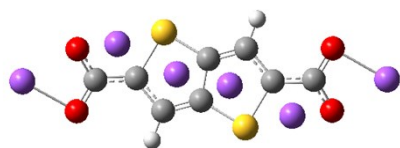

Standard orientation

| Center Number | Element Symbol | Coordinates (Angstroms) |          |          |
|---------------|----------------|-------------------------|----------|----------|
|               |                | X                       | Y        | Z        |
| 1             | C              | -2.32016                | 0.440253 | 0.102841 |
| 2             | C              | -1.33479                | 0.848931 | -0.86418 |
| 3             | C              | -0.06774                | 0.423633 | -0.58232 |
| 4             | C              | 0.080395                | -0.40489 | 0.602284 |
| 5             | C              | 2.330909                | -0.4223  | -0.08401 |
| 6             | C              | 1.346112                | -0.8378  | 0.878737 |
| 7             | H              | -1.63727                | 1.419652 | -1.73838 |
| 8             | H              | 1.648097                | -1.41398 | 1.749443 |
| 9             | S              | -1.49354                | -0.51968 | 1.444952 |
| 10            | S              | 1.503797                | 0.527983 | -1.43081 |
| 11            | C              | -3.72288                | 0.352537 | -0.11258 |
| 12            | O              | -4.42694                | -0.51832 | 0.578408 |
| 13            | O              | -4.28711                | 1.096938 | -0.98743 |
| 14            | C              | 3.734875                | -0.34733 | 0.119586 |
| 15            | O              | 4.440821                | 0.514946 | -0.58252 |
| 16            | O              | 4.301803                | -1.09206 | 0.992693 |
| 17            | Na             | -6.22635                | 0.368236 | -0.35148 |
| 18            | Na             | 6.240459                | -0.4233  | 0.291448 |
| 19            | Na             | -3.11695                | -2.29961 | 0.010899 |
| 20            | Na             | 3.133192                | 2.293605 | -0.00513 |
| 21            | Na             | -0.90227                | 2.340116 | 1.289063 |
| 22            | Na             | 0.809748                | -2.32168 | -1.29014 |

Electronic Energy (EE) = -2376.787777

**Table S1d**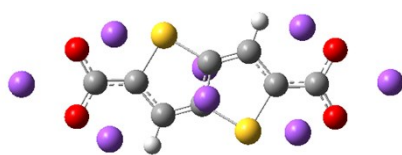

Standard orientation

| Center Number | Element Symbol | Coordinates (Angstroms) |          |          |
|---------------|----------------|-------------------------|----------|----------|
|               |                | X                       | Y        | Z        |
| 1             | C              | -2.24934                | 0.452986 | -0.50443 |
| 2             | C              | -1.3284                 | -0.44778 | -1.13735 |
| 3             | C              | -0.0808                 | -0.44657 | -0.56322 |
| 4             | C              | 0.081183                | 0.445913 | 0.564292 |
| 5             | C              | 2.249723                | -0.45353 | 0.505494 |
| 6             | C              | 1.328856                | 0.447278 | 1.138254 |
| 7             | H              | -1.63215                | -1.07179 | -1.97525 |
| 8             | H              | 1.632715                | 1.071305 | 1.976116 |
| 9             | S              | -1.36095                | 1.491204 | 0.695498 |
| 10            | S              | 1.361386                | -1.49168 | -0.69452 |
| 11            | C              | -3.6538                 | 0.445404 | -0.5423  |
| 12            | O              | -4.33669                | 1.20848  | 0.267079 |
| 13            | O              | -4.27554                | -0.39911 | -1.31867 |
| 14            | C              | 3.654235                | -0.44504 | 0.542692 |
| 15            | O              | 4.337326                | -1.20734 | -0.26714 |
| 16            | O              | 4.27565                 | 0.399841 | 1.318894 |
| 17            | Na             | -6.21711                | 0.363034 | -0.56129 |
| 18            | Na             | 6.217345                | -0.36035 | 0.560941 |
| 19            | Na             | -3.57986                | 0.255894 | 2.218608 |
| 20            | Na             | 3.579693                | -0.25678 | -2.21895 |
| 21            | Na             | 0.60465                 | 2.025922 | -1.62403 |
| 22            | Na             | -0.60658                | -2.02761 | 1.623416 |
| 23            | Na             | 3.649959                | 2.301318 | 0.193896 |
| 24            | Na             | -3.65023                | -2.30132 | -0.19609 |

Electronic Energy (EE) =-2701.393836

**Table S2** Electrochemical performance of organic electrode materials reported.

| No. | Carbon additives (wt%) | Discharge capacity 1 <sup>st</sup> /2 <sup>nd</sup> (mAh g <sup>-1</sup> ) | Rates                                        | Capacity (mAh g <sup>-1</sup> )/ Cycle number | Ref.     |
|-----|------------------------|----------------------------------------------------------------------------|----------------------------------------------|-----------------------------------------------|----------|
| 1   | 40%SP                  | 1195/284                                                                   | 100 mA g <sup>-1</sup>                       | 249/100                                       | 5        |
| 2   | 40%SP                  | 375/290                                                                    | 50 mA g <sup>-1</sup>                        | 204/50                                        | 6        |
| 3   | 40%SP                  | 799.9/503                                                                  | 0.1 A g <sup>-1</sup>                        | 391/400                                       | 7        |
| 4   | 37.5%CB                | 700/233                                                                    | 30 mA g <sup>-1</sup>                        | 202/5                                         | 8        |
| 5   | 30%SP                  | 191/233                                                                    | 0.02 C                                       | 90/100                                        | 9        |
| 6   | 20%SP                  | ~850/534                                                                   | 100 mA g <sup>-1</sup>                       | 440/100                                       | 10       |
| 7   | 20%CB                  | 230                                                                        | 0.01 A g <sup>-1</sup>                       | 180/40                                        | 11       |
| 8   | 35%SP                  | 801/240                                                                    | 10 mA g <sup>-1</sup>                        | 200/50                                        | 12       |
| 9   | 50%AB                  | 133/                                                                       | 200 mA g <sup>-1</sup>                       | ~140/500                                      | 13       |
| 10  | 30%AB                  | 351/201                                                                    | 25 mA g <sup>-1</sup>                        | 131/120                                       | 14       |
| 11  | 20%SP                  | 150/138                                                                    | 200 mA g <sup>-1</sup>                       | 108/300                                       | 15       |
| 12  | 30%KB                  | 275/-                                                                      | 25mA g <sup>-1</sup>                         | 130/100                                       | 16       |
| 13  | 30%CB                  | 1100/320                                                                   | 500 mA g <sup>-1</sup>                       | 95/100                                        | 17       |
| 14  | 30%AB                  | 126/121                                                                    | 100 mA g <sup>-1</sup>                       | 105/50                                        | 18       |
| 15  | 30%SP                  | ~295/295(100th)                                                            | 200 mA g <sup>-1</sup>                       | 210/1400                                      | 19       |
| 16  | 28.6%SP                | 430/208                                                                    | 0.1 C                                        | 170/150                                       | 20       |
| 17  | 40%AB                  | 248/240                                                                    | 250 mA g <sup>-1</sup>                       | 105/100                                       | 21       |
| 18  | 30%SP                  | 697/425                                                                    | 50 mA g <sup>-1</sup><br>2 A g <sup>-1</sup> | 425/40<br>286/4000                            | Our work |



**Table S3** Coordinates of molecular structures

All coordinates are reported as XYZ Cartesian coordinates. Converged geometries and the thermochemistry were also obtained from M06/6-31+G(d,p) level of theory. They are stated in Hartrees units. All energies reported were calculated using the GAUSSIAN 09 Revision-D.01 computational chemistry package.

**Table S3a*****a*** Tetrathiafulvalene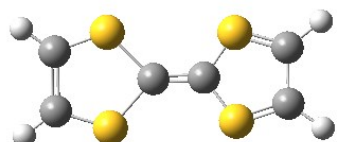

| Center Number | Element Symbol | Standard orientation |            |            |
|---------------|----------------|----------------------|------------|------------|
|               |                | X                    | Y          | Z          |
| 1             | C              | 0.6749020            | 0.0000370  | -0.0002110 |
| 2             | C              | -3.1836500           | 0.6682130  | 0.0004530  |
| 3             | C              | -3.1836410           | -0.6682500 | 0.0004810  |
| 4             | H              | -4.0763590           | 1.2849650  | 0.0007240  |
| 5             | H              | -4.0763400           | -1.2850180 | 0.0007540  |
| 6             | C              | -0.6747210           | -0.0000090 | -0.0001710 |
| 7             | S              | -1.6378830           | 1.4953570  | -0.0002470 |
| 8             | S              | -1.6378600           | -1.4953760 | -0.0000680 |
| 9             | S              | 1.6376000            | 1.4954370  | -0.0001800 |
| 10            | S              | 1.6376550            | -1.4953720 | -0.0003570 |
| 11            | C              | 3.1841000            | -0.6682440 | 0.0005570  |
| 12            | H              | 4.0765470            | -1.2853580 | 0.0009430  |
| 13            | C              | 3.1842270            | 0.6681540  | 0.0005960  |
| 14            | H              | 4.0766540            | 1.2852780  | 0.0009800  |

Electronic Energy (EE) = -1823.455762

**Table S3b**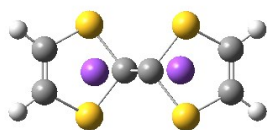

Standard orientation

| Center Number | Element Symbol | Coordinates (Angstroms) |            |            |
|---------------|----------------|-------------------------|------------|------------|
|               |                | X                       | Y          | Z          |
| 1             | C              | 0.4084510               | -0.0077290 | 0.6649180  |
| 2             | C              | -2.9387350              | 0.6756050  | 0.0554580  |
| 3             | C              | -2.9404000              | -0.6694240 | 0.0389410  |
| 4             | H              | -3.7692080              | 1.2890200  | 0.4010830  |
| 5             | H              | -3.7726240              | -1.2891600 | 0.3687610  |
| 6             | C              | -0.4092320              | 0.0096220  | -0.6635290 |
| 7             | S              | -1.5226890              | 1.4496920  | -0.7159320 |
| 8             | S              | -1.5254170              | -1.4274790 | -0.7506450 |
| 9             | S              | 1.5230910               | 1.4307330  | 0.7532680  |
| 10            | S              | 1.5254290               | -1.4470160 | 0.7132710  |
| 11            | C              | 2.9405470               | -0.6684570 | -0.0566940 |
| 12            | H              | 3.7719520               | -1.2804870 | -0.4025170 |
| 13            | C              | 2.9386110               | 0.6763790  | -0.0389010 |
| 14            | H              | 3.7682850               | 1.2994170  | -0.3688390 |
| 15            | Na             | -1.3553530              | -0.0387460 | 2.2009500  |
| 16            | Na             | 1.3553100               | 0.0196870  | -2.2008620 |

Electronic Energy (EE) = -2148.021803

**Table S4a*****b*** Thioindigo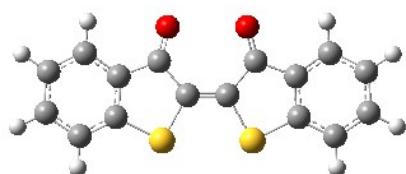

| Center Number | Element Symbol | Standard orientation |            |            |
|---------------|----------------|----------------------|------------|------------|
|               |                | X                    | Y          | Z          |
| 1             | C              | 3.1216020            | -0.7717070 | -0.0239250 |
| 2             | C              | 3.0293790            | 0.6156430  | 0.0353320  |
| 3             | C              | 4.1795670            | 1.3989300  | 0.0535760  |
| 4             | C              | 5.4202130            | 0.7740190  | 0.0023130  |
| 5             | C              | 5.4996060            | -0.6204090 | -0.0601760 |
| 6             | C              | 4.3529840            | -1.4120250 | -0.0718210 |
| 7             | C              | 1.6476690            | 1.1315390  | 0.0960380  |
| 8             | H              | 4.0776170            | 2.4808470  | 0.1069610  |
| 9             | H              | 6.3308360            | 1.3668420  | 0.0118200  |
| 10            | H              | 6.4746140            | -1.1006290 | -0.0998290 |
| 11            | H              | 4.4235780            | -2.4959840 | -0.1173580 |
| 12            | C              | 0.6798560            | -0.0281280 | 0.0088680  |
| 13            | C              | -0.6798560           | -0.0281280 | -0.0088670 |
| 14            | C              | -1.6476690           | 1.1315390  | -0.0960360 |
| 15            | C              | -3.0293790           | 0.6156430  | -0.0353320 |
| 16            | C              | -3.1216020           | -0.7717070 | 0.0239250  |
| 17            | C              | -4.1795670           | 1.3989300  | -0.0535770 |
| 18            | C              | -4.3529840           | -1.4120250 | 0.0718210  |
| 19            | C              | -5.4202130           | 0.7740190  | -0.0023140 |
| 20            | H              | -4.0776170           | 2.4808470  | -0.1069630 |
| 21            | C              | -5.4996060           | -0.6204090 | 0.0601750  |
| 22            | H              | -4.4235780           | -2.4959840 | 0.1173580  |
| 23            | H              | -6.3308360           | 1.3668420  | -0.0118220 |
| 24            | H              | -6.4746140           | -1.1006290 | 0.0998280  |
| 25            | O              | 1.3552230            | 2.2989820  | 0.2340090  |
| 26            | O              | -1.3552230           | 2.2989820  | -0.2340080 |
| 27            | S              | -1.5433820           | -1.5731320 | 0.0250900  |
| 28            | S              | 1.5433820            | -1.5731320 | -0.0250900 |

Electronic Energy (EE) = -1560.788762

**Table S4b**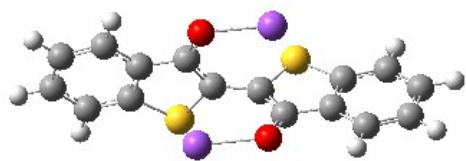

| Standard orientation |                |                         |            |            |
|----------------------|----------------|-------------------------|------------|------------|
| Center Number        | Element Symbol | Coordinates (Angstroms) |            |            |
|                      |                | X                       | Y          | Z          |
| 1                    | C              | -3.1940280              | 0.7694280  | -0.3966950 |
| 2                    | C              | -2.9295260              | -0.2683100 | 0.5150820  |
| 3                    | C              | -3.9917470              | -0.9882630 | 1.0742860  |
| 4                    | C              | -5.2931940              | -0.6647010 | 0.7248940  |
| 5                    | C              | -5.5464540              | 0.3777360  | -0.1818550 |
| 6                    | C              | -4.5059250              | 1.1015230  | -0.7472370 |
| 7                    | C              | -1.5035320              | -0.4772270 | 0.7802920  |
| 8                    | H              | -3.7640580              | -1.7834040 | 1.7818070  |
| 9                    | H              | -6.1265820              | -1.2132480 | 1.1578630  |
| 10                   | H              | -6.5729670              | 0.6254380  | -0.4433970 |
| 11                   | H              | -4.7049340              | 1.9129860  | -1.4444400 |
| 12                   | C              | -0.7236810              | 0.4170130  | 0.0336250  |
| 13                   | C              | 0.7235000               | 0.4183080  | -0.0476480 |
| 14                   | C              | 1.5058180               | -0.4850990 | -0.7804560 |
| 15                   | C              | 2.9308420               | -0.2727260 | -0.5123360 |
| 16                   | C              | 3.1917250               | 0.7755010  | 0.3886040  |
| 17                   | C              | 3.9954030               | -0.9994640 | -1.0581840 |
| 18                   | C              | 4.5021930               | 1.1116650  | 0.7405950  |
| 19                   | C              | 5.2954090               | -0.6721370 | -0.7068700 |
| 20                   | H              | 3.7705130               | -1.8029020 | -1.7571870 |
| 21                   | C              | 5.5450300               | 0.3810380  | 0.1884410  |
| 22                   | H              | 4.6984260               | 1.9312510  | 1.4290260  |
| 23                   | H              | 6.1305120               | -1.2261760 | -1.1294190 |
| 24                   | H              | 6.5704600               | 0.6315360  | 0.4515320  |
| 25                   | O              | -1.0681380              | -1.4102640 | 1.5501180  |
| 26                   | O              | 1.0729980               | -1.4275080 | -1.5401640 |
| 27                   | S              | 1.7161050               | 1.5442740  | 0.9476930  |
| 28                   | S              | -1.7208080              | 1.5322920  | -0.9696270 |
| 29                   | Na             | 1.0734380               | -1.2936770 | 1.8382070  |
| 30                   | Na             | -1.0712580              | -1.3194200 | -1.8256340 |

Electronic Energy (EE) = -1885.487911

**Table S4c**

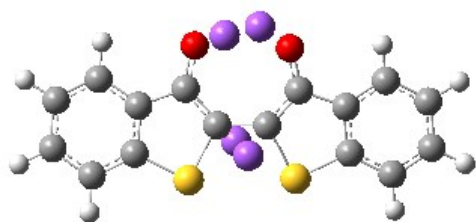

Standard orientation

| Center Number | Element Symbol | Coordinates (Angstroms) |            |            |
|---------------|----------------|-------------------------|------------|------------|
|               |                | X                       | Y          | Z          |
| 1             | C              | -3.1345420              | -1.0199140 | 0.1312990  |
| 2             | C              | -3.0218680              | 0.3506560  | -0.1336700 |
| 3             | C              | -4.1823010              | 1.1166710  | -0.2844160 |
| 4             | C              | -5.4208470              | 0.5053430  | -0.1614820 |
| 5             | C              | -5.5153340              | -0.8676580 | 0.1077260  |
| 6             | C              | -4.3725670              | -1.6450250 | 0.2525290  |
| 7             | C              | -1.6485960              | 0.8346210  | -0.2444430 |
| 8             | H              | -4.0839540              | 2.1780880  | -0.5020020 |
| 9             | H              | -6.3294410              | 1.0921030  | -0.2743080 |
| 10            | H              | -6.4936910              | -1.3324910 | 0.2049810  |
| 11            | H              | -4.4432800              | -2.7105560 | 0.4594800  |
| 12            | C              | -0.7279160              | -0.2046380 | -0.0253670 |
| 13            | C              | 0.7275780               | -0.2044210 | 0.0244950  |
| 14            | C              | 1.6484130               | 0.8344670  | 0.2447230  |
| 15            | C              | 3.0216230               | 0.3504310  | 0.1334700  |
| 16            | C              | 3.1342530               | -1.0198450 | -0.1329870 |
| 17            | C              | 4.1820720               | 1.1161680  | 0.2854850  |
| 18            | C              | 4.3722590               | -1.6449230 | -0.2545190 |
| 19            | C              | 5.4206070               | 0.5048720  | 0.1622640  |
| 20            | H              | 4.0837600               | 2.1773270  | 0.5043340  |
| 21            | C              | 5.5150570               | -0.8678230 | -0.1084660 |
| 22            | H              | 4.4429450               | -2.7102400 | -0.4625730 |
| 23            | H              | 6.3292130               | 1.0914180  | 0.2760960  |
| 24            | H              | 6.4934000               | -1.3326560 | -0.2058530 |
| 25            | O              | -1.3847430              | 2.0794290  | -0.4878680 |
| 26            | O              | 1.3849620               | 2.0789730  | 0.4902300  |
| 27            | S              | 1.5575980               | -1.7818580 | -0.2723430 |
| 28            | S              | -1.5579620              | -1.7822930 | 0.2694380  |
| 29            | Na             | 0.5126360               | 2.5418560  | -1.5885300 |
| 30            | Na             | -0.5123650              | 2.5352340  | 1.5933880  |
| 31            | Na             | -0.1811820              | -0.8771890 | -2.6181200 |
| 32            | Na             | 0.1825260               | -0.8842350 | 2.6175870  |

Electronic Energy (EE) = -2210.028215

**Table S5a****C** Sodium dithieno[3,2-b:2',3'-d]thiophene-2,6-dicarboxylate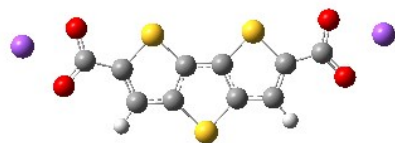

Standard orientation

| Center Number | Element Symbol | Coordinates (Angstroms) |            |            |
|---------------|----------------|-------------------------|------------|------------|
|               |                | X                       | Y          | Z          |
| 1             | C              | -0.7085740              | 0.0040770  | -0.0000030 |
| 2             | C              | -1.2380250              | 1.2939330  | 0.0000580  |
| 3             | C              | -3.1778180              | 0.0586730  | -0.0000160 |
| 4             | S              | -1.9560200              | -1.1960360 | -0.0000880 |
| 5             | S              | 0.0000600               | 2.5363520  | 0.0001180  |
| 6             | C              | 1.2380850               | 1.2939510  | 0.0000270  |
| 7             | C              | 0.7086670               | 0.0040200  | -0.0000150 |
| 8             | C              | 2.6501230               | 1.3239810  | 0.0000180  |
| 9             | H              | 3.2811700               | 2.2064010  | 0.0001020  |
| 10            | S              | 1.9559510               | -1.1960610 | -0.0000010 |
| 11            | C              | 3.1778300               | 0.0585920  | 0.0000370  |
| 12            | C              | 4.6094130               | -0.3123930 | 0.0000050  |
| 13            | O              | 4.9042040               | -1.5450340 | -0.0000220 |
| 14            | O              | 5.4627820               | 0.6229840  | -0.0000130 |
| 15            | C              | -4.6094500              | -0.3122440 | -0.0000280 |
| 16            | O              | -4.9042770              | -1.5448910 | 0.0005140  |
| 17            | O              | -5.4628020              | 0.6231570  | -0.0005640 |
| 18            | C              | -2.6500390              | 1.3240580  | 0.0000500  |
| 19            | H              | -3.2809930              | 2.2065450  | 0.0001050  |
| 20            | Na             | -7.0232450              | -0.9269430 | 0.0000090  |
| 21            | Na             | 7.0231930               | -0.9267520 | -0.0000810 |

Electronic Energy (EE) =-2202.000048

**Table S5b**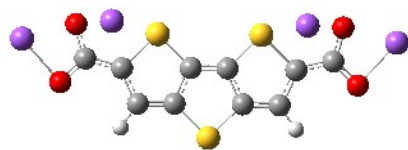

Standard orientation

| Center Number | Element Symbol | Coordinates (Angstroms) |            |            |
|---------------|----------------|-------------------------|------------|------------|
|               |                | X                       | Y          | Z          |
| 1             | C              | -0.6795950              | 0.2150550  | -0.0461930 |
| 2             | C              | -1.2665760              | 1.5279310  | -0.0941580 |
| 3             | C              | -3.2277170              | 0.2524970  | -0.2122460 |
| 4             | S              | -1.9226810              | -1.0202430 | -0.2285470 |
| 5             | S              | 0.0000740               | 2.7764860  | 0.0004340  |
| 6             | C              | 1.2666160               | 1.5278190  | 0.0948700  |
| 7             | C              | 0.6795480               | 0.2149820  | 0.0468640  |
| 8             | C              | 2.6272930               | 1.5513640  | 0.2044570  |
| 9             | H              | 3.2525290               | 2.4384410  | 0.2432670  |
| 10            | S              | 1.9225170               | -1.0205040 | 0.2287970  |
| 11            | C              | 3.2276350               | 0.2521920  | 0.2131610  |
| 12            | C              | 4.5934750               | -0.0902790 | 0.1602610  |
| 13            | O              | 4.9324110               | -1.3467090 | -0.1312750 |
| 14            | O              | 5.5130910               | 0.7878240  | 0.3352080  |
| 15            | C              | -4.5936340              | -0.0898230 | -0.1597490 |
| 16            | O              | -4.9328170              | -1.3462670 | 0.1315080  |
| 17            | O              | -5.5130780              | 0.7883200  | -0.3351730 |
| 18            | C              | -2.6272640              | 1.5515970  | -0.2036320 |
| 19            | H              | -3.2524160              | 2.4387410  | -0.2422450 |
| 20            | Na             | -6.9513240              | -0.7972600 | -0.5530320 |
| 21            | Na             | 6.9517350               | -0.7978630 | 0.5504310  |
| 22            | Na             | -3.5555210              | -1.4399760 | 1.8473480  |
| 23            | Na             | 3.5556360               | -1.4371150 | -1.8480120 |

Electronic Energy (EE) = -2526.546989

**Table S5c**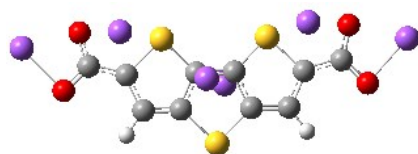

Standard orientation

| Center Number | Element Symbol | Coordinates (Angstroms) |            |            |
|---------------|----------------|-------------------------|------------|------------|
|               |                | X                       | Y          | Z          |
| 1             | C              | -0.6870000              | 0.1621170  | -0.0110730 |
| 2             | C              | -1.2728200              | 1.4794900  | -0.1275780 |
| 3             | C              | -3.2113600              | 0.1912690  | -0.3210890 |
| 4             | S              | -1.9050210              | -1.0709370 | -0.3658620 |
| 5             | S              | -0.0000180              | 2.7429190  | -0.0015630 |
| 6             | C              | 1.2728800               | 1.4797330  | 0.1262260  |
| 7             | C              | 0.6870850               | 0.1621630  | 0.0117780  |
| 8             | C              | 2.6308340               | 1.4907060  | 0.3247540  |
| 9             | H              | 3.2617390               | 2.3733000  | 0.3786110  |
| 10            | S              | 1.9052410               | -1.0702410 | 0.3682080  |
| 11            | C              | 3.2115500               | 0.1918930  | 0.3208240  |
| 12            | C              | 4.5796210               | -0.1669730 | 0.1890380  |
| 13            | O              | 4.8782230               | -1.4023370 | -0.1613240 |
| 14            | O              | 5.5019230               | 0.6976350  | 0.3705690  |
| 15            | C              | -4.5794890              | -0.1673690 | -0.1893680 |
| 16            | O              | -4.8782990              | -1.4022320 | 0.1625310  |
| 17            | O              | -5.5016930              | 0.6970270  | -0.3725090 |
| 18            | C              | -2.6306860              | 1.4901140  | -0.3267100 |
| 19            | H              | -3.2616090              | 2.3725960  | -0.3821760 |
| 20            | Na             | -6.9788870              | -0.8806960 | -0.3204190 |
| 21            | Na             | 6.9791370               | -0.8801800 | 0.3192430  |
| 22            | Na             | -3.4334200              | -1.4689070 | 1.9247890  |
| 23            | Na             | 3.4326400               | -1.4726450 | -1.9223680 |
| 24            | Na             | -0.2893620              | 0.4868780  | -2.5406730 |
| 25            | Na             | 0.2891410               | 0.4907000  | 2.5408870  |

Electronic Energy (EE) =-2851.106564



**Table S5d**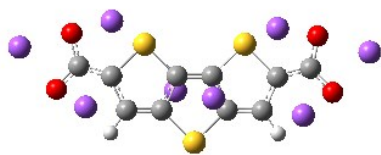

| Center Number | Element Symbol | Standard orientation    |            |            |
|---------------|----------------|-------------------------|------------|------------|
|               |                | Coordinates (Angstroms) |            |            |
|               |                | X                       | Y          | Z          |
| 1             | C              | 0.6383840               | 0.0072760  | 0.2483170  |
| 2             | C              | 1.2032950               | 1.3259610  | 0.4180230  |
| 3             | C              | 3.1165960               | 0.0404260  | 0.8162660  |
| 4             | S              | 1.8259560               | -1.2235960 | 0.6845110  |
| 5             | S              | -0.0001030              | 2.5915410  | 0.0007610  |
| 6             | C              | -1.2041520              | 1.3271430  | -0.4180070 |
| 7             | C              | -0.6390570              | 0.0079850  | -0.2527330 |
| 8             | C              | -2.5462100              | 1.3444540  | -0.6988590 |
| 9             | H              | -3.1495290              | 2.2393170  | -0.8351910 |
| 10            | S              | -1.8273090              | -1.2216060 | -0.6905220 |
| 11            | C              | -3.1180910              | 0.0428000  | -0.8169030 |
| 12            | C              | -4.4751090              | -0.3304090 | -0.7466970 |
| 13            | O              | -4.7971010              | -1.5889630 | -0.6405690 |
| 14            | O              | -5.3975480              | 0.5868820  | -0.6831980 |
| 15            | C              | 4.4736560               | -0.3327510 | 0.7477520  |
| 16            | O              | 4.7957130               | -1.5910670 | 0.6386590  |
| 17            | O              | 5.3964050               | 0.5845630  | 0.6887490  |
| 18            | C              | 2.5448870               | 1.3424970  | 0.7011970  |
| 19            | H              | 3.1478490               | 2.2369840  | 0.8415230  |
| 20            | Na             | 6.9328970               | -1.0103940 | 0.5581680  |
| 21            | Na             | -6.9339940              | -1.0087130 | -0.5541540 |
| 22            | Na             | 3.7758140               | -1.9723140 | -1.4002430 |
| 23            | Na             | -3.7735950              | -1.9763450 | 1.3954040  |
| 24            | Na             | -1.4491910              | 0.7219460  | 2.2936540  |
| 25            | Na             | 1.4532980               | 0.7289880  | -2.2945190 |
| 26            | Na             | -4.8290300              | 1.3746570  | 1.4085860  |
| 27            | Na             | 4.8310780               | 1.3784150  | -1.4015860 |

Electronic Energy (EE) =-3175.709375

**Table S5e**

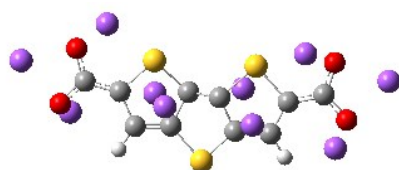

Standard orientation

| Center<br>Number | Element<br>Symbol | Coordinates (Angstroms) |            |            |
|------------------|-------------------|-------------------------|------------|------------|
|                  |                   | X                       | Y          | Z          |
| 1                | C                 | -0.6865720              | 0.0042620  | 0.2726730  |
| 2                | C                 | -1.2646760              | 1.3147000  | -0.0136020 |
| 3                | C                 | -3.2354920              | 0.0746590  | -0.3608830 |
| 4                | S                 | -1.9314670              | -1.2228030 | -0.3198250 |
| 5                | S                 | -0.0003460              | 2.5765240  | 0.0035120  |
| 6                | C                 | 1.2640390               | 1.3148020  | 0.0163420  |
| 7                | C                 | 0.6863290               | 0.0055990  | -0.2771440 |
| 8                | C                 | 2.5802400               | 1.3735040  | 0.3915130  |
| 9                | H                 | 3.1274210               | 2.2849920  | 0.6243220  |
| 10               | S                 | 1.9310630               | -1.2243170 | 0.3107390  |
| 11               | C                 | 3.2345730               | 0.0733930  | 0.3610070  |
| 12               | C                 | 4.5601570               | -0.2654390 | 0.6669310  |
| 13               | O                 | 4.9119500               | -1.5251610 | 0.7483940  |
| 14               | O                 | 5.4742960               | 0.6643340  | 0.7702200  |
| 15               | C                 | -4.5614700              | -0.2633540 | -0.6658510 |
| 16               | O                 | -4.9129170              | -1.5228820 | -0.7520930 |
| 17               | O                 | -5.4762070              | 0.6664480  | -0.7636050 |
| 18               | C                 | -2.5814800              | 1.3750710  | -0.3867030 |
| 19               | H                 | -3.1290640              | 2.2876560  | -0.6141890 |
| 20               | Na                | -7.0201230              | -0.9242650 | -1.0208460 |
| 21               | Na                | 7.0185520               | -0.9267040 | 1.0234470  |
| 22               | Na                | -4.2454070              | -2.1756840 | 1.2952920  |
| 23               | Na                | 4.2485910               | -2.1709850 | -1.3027250 |
| 24               | Na                | 2.5084600               | 0.5642290  | -2.3211650 |
| 25               | Na                | -2.5066460              | 0.5562230  | 2.3227600  |
| 26               | Na                | 5.5839730               | 1.3855530  | -1.3722160 |
| 27               | Na                | -5.5830240              | 1.3810560  | 1.3807840  |
| 28               | Na                | 0.9436500               | 0.1056070  | 2.4424050  |
| 29               | Na                | -0.9423200              | 0.1187690  | -2.4450070 |

Electronic Energy (EE) = -3500.261887

**Table S5f**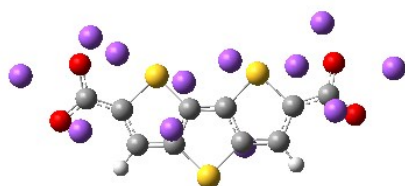

Standard orientation

| Center Number | Element Symbol | Coordinates (Angstroms) |            |            |
|---------------|----------------|-------------------------|------------|------------|
|               |                | X                       | Y          | Z          |
| 1             | C              | -0.6805960              | -0.0359720 | 0.4446630  |
| 2             | C              | -1.2790850              | -0.0189360 | 1.7501060  |
| 3             | C              | -3.2057510              | 0.1184250  | 0.4294310  |
| 4             | S              | -1.8929560              | 0.0227270  | -0.8206120 |
| 5             | S              | -0.0009440              | -0.0251520 | 3.0096060  |
| 6             | C              | 1.2778150               | -0.0095470 | 1.7507490  |
| 7             | C              | 0.6800670               | 0.0297900  | 0.4455190  |
| 8             | C              | 2.6455790               | -0.1047590 | 1.7506950  |
| 9             | H              | 3.2806340               | -0.2009780 | 2.6286420  |
| 10            | S              | 1.8931430               | -0.0068340 | -0.8199680 |
| 11            | C              | 3.2052630               | -0.1250360 | 0.4291460  |
| 12            | C              | 4.5134780               | -0.4433430 | 0.0050150  |
| 13            | O              | 4.6983190               | -0.8000450 | -1.2481790 |
| 14            | O              | 5.5145700               | -0.2782300 | 0.7978760  |
| 15            | C              | -4.5136210              | 0.4436390  | 0.0099710  |
| 16            | O              | -4.6980820              | 0.8191720  | -1.2379400 |
| 17            | O              | -5.5150380              | 0.2665490  | 0.7997840  |
| 18            | C              | -2.6468730              | 0.0758420  | 1.7507940  |
| 19            | H              | -3.2824100              | 0.1562820  | 2.6299890  |
| 20            | Na             | -6.9790700              | 0.4085910  | -0.9201520 |
| 21            | Na             | 6.9784220               | -0.3918110 | -0.9240160 |
| 22            | Na             | -4.4825850              | -1.2188280 | -2.5087940 |
| 23            | Na             | 4.4870790               | 1.2542530  | -2.4965680 |
| 24            | Na             | 1.1794330               | 3.0540700  | -0.9248450 |
| 25            | Na             | -1.1720100              | -3.0397170 | -0.9709810 |
| 26            | Na             | 5.0005710               | 2.0163830  | 0.9274860  |
| 27            | Na             | -5.0059900              | -2.0301750 | 0.8971530  |
| 28            | Na             | 1.0858590               | -2.8038320 | 1.5223640  |
| 29            | Na             | -1.0864320              | 2.7786420  | 1.5594980  |
| 30            | Na             | 3.1154670               | -2.5731350 | -1.4007790 |
| 31            | Na             | -3.1172810              | 2.5958000  | -1.3650840 |

Electronic Energy (EE) = -3824.825356

1. M. Dogru, M. Handloser, F. Auras, T. Kunz, D. Medina, A. Hartschuh, P. Knochel and T. Bein, *Angew. Chem. Int. Ed.*, 2013, **125**, 2992-2996.
2. D. A. Patrick, D. W. Boykin, W. D. Wilson, F. A. Tanious, J. Spsychala, B. C. Bender, J. E. Hall, C. C. Dykstra, K. A. Ohemeng and R. R. Tidwell, *Eur. J. Med. Chem.*, 1997, **32**, 781-793.
3. M. A. Sk and S. Manzhos, *J. Power Sources*, 2016, **324**, 572-581.
4. Y. Chen, Z. Wu and S. Sun, *J. Phys. Chem. C*, 2014, **118**, 21813-21818.
5. C. Ma, X. Zhao, L. Kang, K. X. Wang, J. S. Chen, W. Zhang and J. Liu, *Angew. Chem. Int. Ed.*, 2018, **57**, 8865-8870.
6. C. L. Wang, Y. Xu, Y. G. Fang, M. Zhou, L. Y. Liang, S. Singh, H. P. Zhao, A. Schober and Y. Lei, *J. Am. Chem. Soc.*, 2015, **137**, 3124-3130.
7. S. Xu, H. Li, Y. Chen, Y. Wu, C. Jiang, E. Wang and C. Wang, *J. Mater. Chem. A*, 2020, **8**, 23851-23856.
8. Y. Park, D. S. Shin, S. H. Woo, N. S. Choi, K. H. Shin, S. M. Oh, K. T. Lee and S. Y. Hong, *Adv. Mater.*, 2012, **24**, 3562-3567.
9. S. Renault, V. A. Mihali, K. Edstrom and D. Brandell, *Electrochem. Commun.*, 2014, **45**, 52-55.
10. M.-S. Kim, M. Lee, M.-J. Kim, Y. K. Jeong, J. K. Park and S.-M. Paek, *J. Mater. Chem. A*, 2020, **8**, 17790-17799.
11. K. Sakaushi, E. Hosono, G. Nickerl, T. Gemming, H. Zhou, S. Kaskel and J. Eckert, *Nat. Commun.*, 2013, **4**, 1485-1491.
12. A. Abouimrane, W. Weng, H. Eltayeb, Y. Cui, J. Niklas, O. Poluektov and K.

- Amine, *Energy Environ. Sci.*, 2012, **5**, 9632-9638.
13. S. Eder, D. J. Yoo, W. Nogala, M. Pletzer, A. S. Bonilla, A. J. P. White, K. E. Jelfs, M. Heeney, J. W. Choi and F. Glocklhofer, *Angew. Chem. Int. Edit.*, 2020, **59**, 12958-12964.
  14. H.-g. Wang, S. Yuan, Z. Si and X.-b. Zhang, *Energy Environ. Sci.*, 2015, **8**, 3160-3165.
  15. W. Deng, Y. Shen, J. Qian, Y. Cao and H. Yang, *ACS Appl. Mater. Interfaces*, 2015, **7**, 21095-21099.
  16. J. Li, M. Luo, Z. Ba, Z. Wang, L. Chen, Y. Li, M. Li, H.-B. Li, J. Dong, X. Zhao and Q. Zhang, *J. Mater. Chem. A*, 2019, **7**, 19112-19119.
  17. Z. Li, J. Zhou, R. Xu, S. Liu, Y. Wang, P. Li, W. Wu and M. Wu, *Chem. Eng. J.*, 2016, **287**, 516-522.
  18. H. Banda, D. Damien, K. Nagarajan, M. Hariharan and M. M. Shajumon, *J. Mater. Chem. A*, 2015, **3**, 10453-10458.
  19. Y. Chen, H. Li, M. Tang, S. Zhuo, Y. Wu, E. Wang, S. Wang, C. Wang and W. Hu, *J. Mater. Chem. A*, 2019, **7**, 20891-20898.
  20. A. Choi, Y. K. Kim, T. K. Kim, M. S. Kwon, K. T. Lee and H. R. Moon, *J. Mater. Chem. A*, 2014, **2**, 14986-14993.
  21. F. Wan, X.-L. Wu, J.-Z. Guo, J.-Y. Li, J.-P. Zhang, L. Niu and R.-S. Wang, *Nano Energy*, 2015, **13**, 450-457.
